# Supplementary material
Source: publisher figshare collection journal article supplement (https://diabetesjournals.figshare.com/articles/dataset/_/14573631)
Supplement: Supplementary file 1 [file 27966006]

## SUPPLEMENTARY FIGURES AND TABLES

Supplementary table 1. Macro- and microvascular incidents during follow-up per Mg<sup>2+</sup> quartile.

|                                                    |                | Quartile 1             | Quartile 2                 | Quartile 3                 | Quartile 4              |
|----------------------------------------------------|----------------|------------------------|----------------------------|----------------------------|-------------------------|
|                                                    |                | Mg <sup>2+</sup> <0.75 | Mg <sup>2+</sup> 0.75-0.80 | Mg <sup>2+</sup> 0.80-0.85 | Mg <sup>2+</sup> ≥ 0.80 |
| Major macrovascular<br>(AMI, CHD, HF, CVA,<br>PAD) | Yes            | 110 (12.3)             | 79 (9.3)                   | 72 (8.3)                   | 67 (8.1)                |
|                                                    | No             | 787 (87.7)             | 766 (90.7)                 | 794 (91.7)                 | 756 (91.5)              |
|                                                    | Not registered | 0 (0)                  | 0 (0)                      | 0 (0)                      | 0 (0)                   |
| AMI                                                | Yes            | 31 (2.9)               | 17 (1.7)                   | 26 (2.5)                   | 17 (1.8)                |
|                                                    | No             | 1,017 (96.0)           | 952 (97.0)                 | 994 (95.5)                 | 921 (96.5)              |
|                                                    | Not registered | 11 (1.0)               | 12 (1.2)                   | 10 (1.0)                   | 16 (1.7)                |
| CHD                                                | Yes            | 57 (5.9)               | 35 (3.9)                   | 41 (4.4)                   | 36 (4.1)                |
|                                                    | No             | 904 (93.0)             | 854 (94.8)                 | 884 (94.5)                 | 826 (94.1)              |
|                                                    | Not registered | 11 (1.1)               | 12 (1.3)                   | 10 (1.1)                   | 16 (1.8)                |
| HF                                                 | Yes            | 58 (5.2)               | 37 (3.6)                   | 30 (2.7)                   | 30 (3.0)                |
|                                                    | No             | 1,055 (93.9)           | 973 (95.2)                 | 1,061 (96.4)               | 945 (95.4)              |
|                                                    | Not registered | 11 (1.0)               | 12 (1.2)                   | 10 (0.9)                   | 16 (1.6)                |
| CVA                                                | Yes            | 43 (3.9)               | 25 (2.5)                   | 26 (2.4)                   | 24 (2.4)                |
|                                                    | No             | 1,060 (95.2)           | 978 (96.4)                 | 1,043 (96.7)               | 958 (96.0)              |
|                                                    | Not registered | 11 (1.0)               | 12 (1.2)                   | 10 (0.9)                   | 16 (1.6)                |
| PAD                                                | Yes            | 33 (3.0)               | 28 (2.8)                   | 29 (2.7)                   | 23 (2.3)                |
|                                                    | No             | 1,050 (96.0)           | 966 (96.0)                 | 1,047 (96.4)               | 940 (96.0)              |
|                                                    | Not registered | 11 (1.0)               | 12 (1.2)                   | 10 (0.9)                   | 16 (1.6)                |
| AF                                                 | Yes            | 69 (6.5)               | 38 (3.9)                   | 30 (2.8)                   | 20 (2.1)                |
|                                                    | No             | 990 (93.5)             | 936 (96.1)                 | 1030 (97.2)                | 929 (97.9)              |
|                                                    | Not registered | 0 (0)                  | 0 (0)                      | 0 (0)                      | 0 (0)                   |
| Major microvascular                                | Yes            | 368 (58.7)             | 316 (49.4)                 | 323 (47.5)                 | 278 (45.6)              |
|                                                    | No             | 259 (41.3)             | 324 (50.6)                 | 357 (52.5)                 | 332 (54.4)              |
|                                                    | Not registered | 0 (0)                  | 0 (0)                      | 0 (0)                      | 0 (0)                   |
| CKD                                                | Yes            | 361 (37.5)             | 267 (28.9)                 | 263 (27.2)                 | 202 (24.3)              |
|                                                    | No             | 600 (62.4)             | 667 (71.1)                 | 703 (72.8)                 | 629 (75.7)              |
|                                                    | Not registered | 1 (0.1)                | 0 (0)                      | 0 (0)                      | 0 (0)                   |

|                      |                |            |            |            |            |
|----------------------|----------------|------------|------------|------------|------------|
| Diabetic retinopathy | Yes            | 45 (4.0)   | 36 (3.5)   | 18 (1.6)   | 15 (1.5)   |
|                      | No             | 959 (85.0) | 898 (87.1) | 989 (88.7) | 864 (85.8) |
|                      | Not registered | 124 (11.0) | 97 (9.4)   | 108 (9.7)  | 128 (12.7) |
| Diabetic foot        | Yes            | 336 (45.3) | 268 (38.1) | 287 (37.0) | 256 (35.3) |
|                      | No             | 405 (54.7) | 436 (61.9) | 489 (63.0) | 470 (64.7) |
|                      | Not registered | 0 (0)      | 0 (0)      | 0 (0)      | 0 (0)      |

*Incidents registered in n (%). Morbidity and mortality or complications that are registered after the inclusion date. AF= atrial fibrillation. AMI= acute myocardial infarction, CHD= coronary heart disease, CKD= chronic kidney disease, CVA= cerebrovascular accident, HF= heart failure, Mg<sup>2+</sup>= magnesium, PAD= peripheral arterial disease.*

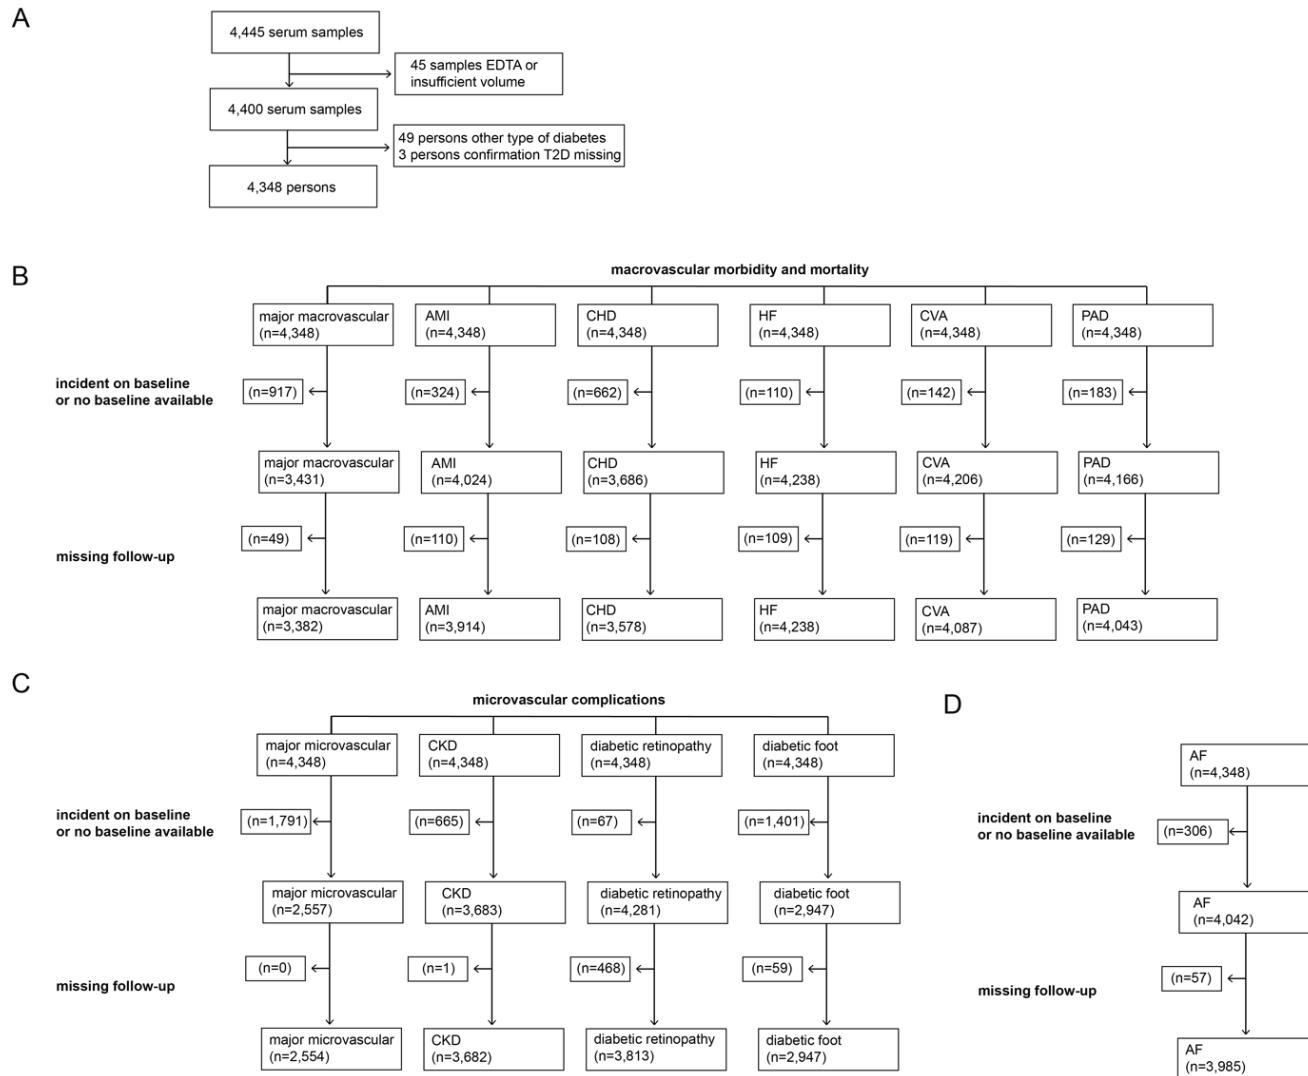

Supplementary figure 1. Flowchart of (A) sample exclusion and flowcharts of the persons excluded for (B) macrovascular disease and mortality, (C) microvascular complications and (D) AF Cox regression analysis. AF=atrial fibrillation, AMI= acute myocardial infarction, CHD= coronary heart disease, CKD= chronic kidney disease, CVA= cerebrovascular accident, HF= heart failure, PAD= peripheral arterial disease.

Supplementary table 2. Sensitivity Cox regression analyses in the linear association of Mg<sup>2+</sup> with macrovascular disease and mortality, AF, and microvascular complications.

|                                              | Main model 2 <sup>1</sup> |         | Adjusting for AF at baseline |         | Adjusting for migration background, BMI, serum creatinine |         | Separating medication <sup>2</sup> |         | Exclusion of Mg <sup>2+</sup> supplement use <sup>3</sup> |         |
|----------------------------------------------|---------------------------|---------|------------------------------|---------|-----------------------------------------------------------|---------|------------------------------------|---------|-----------------------------------------------------------|---------|
|                                              | HR (95% CI)               | P-value | HR (95% CI)                  | P-value | HR (95% CI)                                               | P-value | HR (95% CI)                        | P-value | HR (95% CI)                                               | P-value |
| Major macrovascular (AMI, CHD, HF, CVA, PAD) | 0.87 (0.76-1.00)          | 0.054   | 0.88 (0.76-1.01)             | 0.077   | 0.87 (0.75-1.00)                                          | 0.052   | 0.87 (0.75-1.00)                   | 0.049   | 0.87 (0.76-1.01)                                          | 0.060   |
| AMI                                          | 0.89 (0.68-1.17)          | 0.402   | 0.90 (0.69-1.18)             | 0.448   | 0.90 (0.68-1.17)                                          | 0.442   | 0.91 (0.70-1.19)                   | 0.489   | 0.89 (0.68-1.17)                                          | 0.406   |
| CHD                                          | 0.97 (0.79-1.18)          | 0.733   | 0.97 (0.80-1.19)             | 0.797   | 0.95 (0.77-1.16)                                          | 0.588   | 0.97 (0.79-1.18)                   | 0.761   | 0.96 (0.79-1.18)                                          | 0.704   |
| HF                                           | 0.76 (0.62-0.93)          | 0.008   | 0.78 (0.64-0.95)             | 0.015   | 0.77 (0.63-0.95)                                          | 0.012   | 0.74 (0.60-0.90)                   | 0.003   | 0.76 (0.62-0.93)                                          | 0.008   |
| CVA                                          | 0.83 (0.66-1.04)          | 0.105   | 0.83 (0.66-1.05)             | 0.113   | 0.83 (0.66-1.05)                                          | 0.115   | 0.85 (0.67-1.07)                   | 0.165   | 0.82 (0.65-1.04)                                          | 0.104   |
| PAD                                          | 1.02 (0.80-1.30)          | 0.880   | 1.03 (0.80-1.31)             | 0.837   | 0.97 (0.76-1.23)                                          | 0.774   | 1.01 (0.79-1.29)                   | 0.926   | 1.02 (0.80-1.31)                                          | 0.870   |
| AF                                           | 0.59 (0.49-0.72)          | <0.001  | -                            | -       | 0.60 (0.50-0.73)                                          | <0.001  | 0.59 (0.48-0.71)                   | <0.001  | 0.59 (0.49-0.72)                                          | <0.001  |

|                                                                             |                     |        |                  |        |                  |        |                     |        |                  |        |
|-----------------------------------------------------------------------------|---------------------|--------|------------------|--------|------------------|--------|---------------------|--------|------------------|--------|
| Major microvascular (CKD, diabetic retinopathy, diabetic foot) <sup>4</sup> | 0.85<br>(0.78-0.91) | <0.001 | 0.85 (0.78-0.91) | <0.001 | 0.84 (0.78-0.90) | <0.001 | 0.86<br>(0.80-0.93) | <0.001 | 0.84 (0.78-0.91) | <0.001 |
| CKD <sup>4</sup>                                                            | 0.89<br>(0.82-0.96) | 0.003  | 0.89 (0.82-0.96) | 0.005  | 0.88 (0.81-0.95) | 0.001  | 0.89<br>(0.82-0.97) | 0.008  | 0.89 (0.82-0.96) | 0.003  |
| Diabetic retinopathy <sup>4</sup>                                           | 0.77<br>(0.61-0.98) | 0.031  | 0.77 (0.62-0.98) | 0.035  | 0.79 (0.63-1.00) | 0.057  | 0.78<br>(0.61-0.99) | 0.038  | 0.78 (0.61-0.98) | 0.035  |
| Diabetic foot <sup>4</sup>                                                  | 0.85<br>(0.78-0.92) | <0.001 | 0.85 (0.78-0.92) | <0.001 | 0.84 (0.78-0.91) | <0.001 | 0.86<br>(0.80-0.93) | <0.001 | 0.84 (0.78-0.91) | <0.001 |

<sup>1</sup>Main model 2= age, sex, duration of diabetes (years), SBP (mmHg), TG (mmol/L), LDL cholesterol (mmol/L), albumin/creatinine ratio (mg/mmol), education (low, medium, high), smoking (current, former, never), glucose-lowering drugs (yes/no) and CVD medication (yes/no), <sup>2</sup>Separating medication= insulin use (A10A), glucose-lowering drugs excluding insulins (A10B), antihypertensives (C02), diuretics (C03), and rest CVD medication (C01, C04, C05, C08, C09), <sup>3</sup>Exclusion of Mg<sup>2+</sup> supplement use= 25 people using a type of Mg<sup>2+</sup> excluded from the analysis. Major macrovascular (n=3,361); AMI (n=3,889); CHD (n=3,554); HF (n=4,105); CVA (n=4,062); PAD (n=4,020); AF (n=3,961); major microvascular (n=2,547); CKD (n=3,662); diabetic retinopathy (n=3,792); diabetic foot (n=2,874). <sup>4</sup>CKD is defined as an eGFR<60 mL/min/1.73m<sup>2</sup>, diabetic retinopathy is grade ≥2 and diabetic foot complications grade ≥1. Major macrovascular (n=3,382); AMI (n=3,914); CHD (n=3,578); HF (n=4,129); CVA (n=4,087); PAD (n=4,043); AF (n=3,985); major microvascular (n=2,557); CKD (n=3,682); diabetic retinopathy (n=3,813); diabetic foot (n=2,888). <sup>4</sup>AF= atrial fibrillation, AMI= acute myocardial infarction, CHD= coronary heart disease, CI= confidence interval, CKD= chronic kidney disease, CVA= cerebrovascular accident, CVD= cardiovascular, HF= heart failure, HR= hazard ratio, Mg<sup>2+</sup>= magnesium, PAD= peripheral arterial disease.
